# Supplementary material for: Just Play Cognitive Modern Board and Card Games, It’s Going to Be Good for Your Executive Functions: A Randomized Controlled Trial with Children at Risk of Social Exclusion
Source: MDPI journal article supplement (doi:10.3390/children10091492), 2023-08-31
Supplement: s1 [file s1]

Table S1. Scale to assess the satisfaction through the session.

To which game have you played? \_\_\_\_\_

How many points/cards have you earned at the end of the game? \_\_\_\_\_

Which score do you give to this game? Please, mark one option

|          |   |   |   |   |   |   |   |   |           |
|----------|---|---|---|---|---|---|---|---|-----------|
| 1        | 2 | 3 | 4 | 5 | 6 | 7 | 8 | 9 | 10        |
| Very bad |   |   |   |   |   |   |   |   | Very good |

How have you been playing?

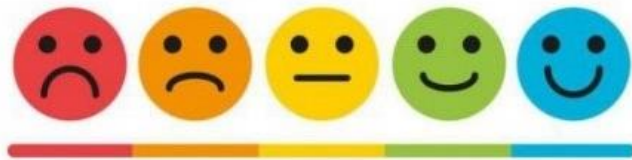

Very bad    Bad    Regular    Good    Very good

Table S2. Brief explanation of the games used and justification of the main cognitive process active when playing.

| Board game                           | Description of the game dynamic                                                                                                                                                                                                                                                                                                                                                                                                                                                                                                                                                                                                                                                                                                                                                                                                                                                                                 | Main cognitive process    |     |
|--------------------------------------|-----------------------------------------------------------------------------------------------------------------------------------------------------------------------------------------------------------------------------------------------------------------------------------------------------------------------------------------------------------------------------------------------------------------------------------------------------------------------------------------------------------------------------------------------------------------------------------------------------------------------------------------------------------------------------------------------------------------------------------------------------------------------------------------------------------------------------------------------------------------------------------------------------------------|---------------------------|-----|
| GAMES USED IN THE EXPERIMENTAL GROUP |                                                                                                                                                                                                                                                                                                                                                                                                                                                                                                                                                                                                                                                                                                                                                                                                                                                                                                                 |                           |     |
| Bee Alert [2]                        | A series of colored bees are hidden under their hives. Players must memorize their starting position. Bees, under their hives, move through the game space according to specific cards. When the bees move, the players need to erase from their memory the initial position and update it in the memory                                                                                                                                                                                                                                                                                                                                                                                                                                                                                                                                                                                                        | Updating                  |     |
| Jungle Speed [41]                    | A wooden totem is in the middle of the table. All the cards are distributed to the players. In turns, players face up the cards. When two cards with exactly the same simbol appear, the first person to take the wooden totem wins. The symbols are very similar, so sometimes players need to inhibit the automatic action of taking the totem when they notice that the two symbols are not really the same. In addition, there are some cards that request all the players to do different actions, activating cognitive shifting.                                                                                                                                                                                                                                                                                                                                                                          | Inhibition<br>flexibility | and |
| Ghost Blitz [42]                     | Five wooden objects are placed in the middle of the table. All the cards are distributed to the players. In turns, players face up the cards. In each card, two objects with two colours are depicted. However, there are two types of cards. In one type, one of the objects matches the figure and color exactly to one object in the middle of the table. The first person to take the correct object, wins the card. The secon type of card consists in a combination of the shapes and colors that doesn't match any object. But always one of the five objects is not represented in the card, neither by the shape nor by the color. Then, the first player to take this object, wins the card. Then, all the people is switching between the two types of cards. In addition, sometimes the players need to inhibit the automatic action of taking one object when they notice that they are mistaking. | Inhibition<br>flexibility | and |
| Dejà Vu [43]                         | Different cardboard tokens are laid on the table. One player begin to flip cards, hiding one on the previous one (only one is faced up in each round). Images of the cardboard tokens are depicted in each card (from two to five images). When one player thinks that one object have appeared the second time, he/she takes the token from the center of the table. In this game you need to update constantly the images that are your memory to decide whether it is the first time you see them or is the secon time.                                                                                                                                                                                                                                                                                                                                                                                      | Updating                  |     |
| GAMES USED IN THE CONTROL GROUP      |                                                                                                                                                                                                                                                                                                                                                                                                                                                                                                                                                                                                                                                                                                                                                                                                                                                                                                                 |                           |     |
| Dixit [44]                           | In each round, one person is a "storyteller". He/she select one card from their hand and, withoug showing the image depicted to the rest of players, he/she makes up a sentence. Then, the other players select one card from their hands that they thinks could fit to the description heard. The storyteller shuffles all the cards and put them face up in a raw and the rest of players try to guess which card whas the chosen one by the storyteller.                                                                                                                                                                                                                                                                                                                                                                                                                                                     | Theory of mind            |     |

---

|                  |                                                                                                                                                                                                                                                                                                                                                                                                                                                                                                                                            |                               |
|------------------|--------------------------------------------------------------------------------------------------------------------------------------------------------------------------------------------------------------------------------------------------------------------------------------------------------------------------------------------------------------------------------------------------------------------------------------------------------------------------------------------------------------------------------------------|-------------------------------|
|                  | Depending on the hits and mistakes, all the players score points. To win in this game, every player needs to discern whether the rest of players will select their cards or not without asking directly to them.                                                                                                                                                                                                                                                                                                                           |                               |
| Mixmo [45]       | Letter tiles are placed in the middle of the table face down. Each player takes six of them. When the game begins all the players turn their tiles and try to make words linked by one letter. When one player uses all the letter, he/she says Mixmo and every player takes two more tiles. So, the game consists on making words very fast.                                                                                                                                                                                              | Verbal fluency                |
| Story Cubes [46] | There are some dice with figures in their faces. In each player turn, he/she throw all of them and explains a story relating all the dice.                                                                                                                                                                                                                                                                                                                                                                                                 | Verbal fluency                |
| Mmm! [47]        | A board with 19 pieaces of food of two to four squares are sketched. In each turn, the player roll three dice with the food depicted in each face. In every roll, the player must place at least one die in a food of the board that matches the face of the roll. After three rolls, it the player cannot place the three dice, he/she loose the oportunity of filling the board squares giving a penalty to all the players. In this game is very important to now when is a good moment to take risks and when is better not to reroll. | Decision-making<br>under risk |

Note. The main cognitive process active when playing, was estimated before applying the games in the intervention by two senior researchers according to the dynamics of the game.

Table S3. Latent Class Analysis of the evolution in playing each game.

**GAMES IN THE EXPERIMENTAL GROUP****Game 1 (Deja-Vu)**

|              | G        | loglik         | conv     | npm      | AIC             | BIC             | SABIC           | entropy          | ICL             | %class1   | %class2   | %class3 |
|--------------|----------|----------------|----------|----------|-----------------|-----------------|-----------------|------------------|-----------------|-----------|-----------|---------|
| lcga1        | 1        | -348.86        | 1        | 3        | 703.7338        | 708.8005        | 699.4127        | 1.0000000        | 708.8005        | 100       |           |         |
| <b>lcga2</b> | <b>2</b> | <b>-298.93</b> | <b>1</b> | <b>6</b> | <b>609.8750</b> | <b>620.0083</b> | <b>601.2327</b> | <b>0.8994997</b> | <b>541.6750</b> | <b>40</b> | <b>60</b> |         |
| lcga3        | 3        | -296.09        | 1        | 9        | 610.1911        | 625.3910        | 597.2276        | 0.7305492        | 556.1047        | 35        | 35        | 30      |
|              | G        | loglik         | conv     | npm      | AIC             | BIC             | SABIC           | entropy          | ICL             | %class1   | %class2   | %class3 |
| gmm1         | 1        | -306.71        | 1        | 4        | 621.4202        | 628.1757        | 615.6587        | 1.0000000        | 628.1757        | 100.0     |           |         |
| gmm2         | 2        | -296.65        | 1        | 8        | 609.3104        | 622.8215        | 597.7874        | 0.7424893        | 548.9031        | 55.0      | 45        |         |
| gmm3         | 3        | -295.49        | 1        | 12       | 614.9900        | 635.2565        | 597.7053        | 0.7078822        | 566.1900        | 27.5      | 35        | 37.5    |
|              | G        | loglik         | conv     | npm      | AIC             | BIC             | SABIC           | entropy          | ICL             | %class1   | %class2   | %class3 |
| gmm1_2       | 1        | -302.08        | 1        | 6        | 616.1763        | 626.3096        | 607.5340        | 1.0000000        | 626.3096        | 100.0     |           |         |
| gmm2_2       | 2        | -296.63        | 1        | 10       | 613.2616        | 630.1504        | 598.8577        | 0.7559594        | 555.9121        | 55.0      | 45        |         |
| gmm3_2       | 3        | -295.46        | 1        | 14       | 618.9280        | 642.5724        | 598.7627        | 0.7059223        | 573.5769        | 27.5      | 35        | 37.5    |
|              | G        | loglik         | conv     | npm      | AIC             | BIC             | SABIC           | entropy          | ICL             | %class1   | %class2   | %class3 |
| gmm1_3       | 1        | -306.51        | 1        | 5        | 623.0265        | 631.4709        | 615.8246        | 1.0000000        | 631.4709        | 100.0     |           |         |
| gmm2_3       | 2        | -296.51        | 1        | 9        | 611.0383        | 626.2382        | 598.0749        | 0.8228766        | 549.7733        | 60.0      | 40        |         |
| gmm3_3       | 3        | -295.25        | 1        | 13       | 616.5031        | 638.4586        | 597.7781        | 0.7361113        | 569.0132        | 22.5      | 40        | 37.5    |

**Game 2 (Jungle Speed)**

|              | G        | loglik         | conv     | npm      | AIC             | BIC             | SABIC           | entropy          | ICL             | %class1         | %class2         | %class3  |
|--------------|----------|----------------|----------|----------|-----------------|-----------------|-----------------|------------------|-----------------|-----------------|-----------------|----------|
| lcga1        | 1        | -279.32        | 1        | 3        | 564.6551        | 569.8681        | 560.4735        | 1.0000000        | 569.8681        | 100.00000       |                 |          |
| <b>lcga2</b> | <b>2</b> | <b>-262.17</b> | <b>1</b> | <b>6</b> | <b>536.3411</b> | <b>546.7671</b> | <b>527.9779</b> | <b>0.9867162</b> | <b>462.9404</b> | <b>92.85714</b> | <b>7.142857</b> |          |
| lcga3        | 3        | -262.13        | 1        | 9        | 542.2636        | 557.9026        | 529.7188        | 0.9633598        | 474.9806        | 92.85714        | 0.000000        | 7.142857 |
|              | G        | loglik         | conv     | npm      | AIC             | BIC             | SABIC           | entropy          | ICL             | %class1         | %class2         | %class3  |
| gmm1         | 1        | -272.06        | 1        | 4        | 552.1312        | 559.0819        | 546.5557        | 1.000000         | 559.0819        | 100.00000       |                 |          |
| gmm2         | 2        | -262.17        | 1        | 8        | 540.3411        | 554.2424        | 529.1902        | 0.986716         | 470.4158        | 7.14285         | 92.85714        |          |
| gmm3         | 3        | -1.e+09        | 4        | 12       | 2.00e+09        | 2.00e+09        | 2.00e+09        | 1.000000         | 2.00e+09        | 0.00000         | 0.00000         | 0        |
|              | G        | loglik         | conv     | npm      | AIC             | BIC             | SABIC           | entropy          | ICL             | %class1         | %class2         | %class3  |

```

gmm1_2 1 -270.70 1 6 553.4170 563.8430 545.0538 1.0000000 563.8430 100.000000
gmm2_2 2 -262.15 1 10 544.3150 561.6917 530.3764 0.9870903 477.8566 7.142857 92.857143
gmm3_2 3 -262.15 1 14 552.3082 576.6355 532.7941 0.4981886 515.7765 88.095238 7.142857 4.761905
  G loglik conv npm AIC BIC SABIC entropy ICL %class1 %class2 %class3
gmm1_3 1 -270.60 1 5 551.2151 559.9035 544.2458 1.0000000 559.9035 100.000000
gmm2_3 2 -259.41 1 9 536.8250 552.4640 524.2802 0.9713064 469.4211 7.142857 92.85714
gmm3_3 3 -259.37 1 13 544.7544 567.3441 526.6342 0.4417335 512.8454 7.142857 28.57143 64.28571

```

### Game 3 (Bee alert)

```

  G loglik conv npm AIC BIC SABIC entropy ICL %class1 %class2 %class3
lcga1 1 -275.3050 1 3 556.6100 561.6766 552.2888 1.0000000 561.6766 100.0
lcga2 2 -272.7644 1 6 557.5287 567.6620 548.8864 0.5230242 499.6220 27.5 72.5
lcga3 3 -272.7644 1 9 563.5287 578.7287 550.5653 0.2479948 531.3438 70.0 0.0 30
  G loglik conv npm AIC BIC SABIC entropy ICL %class1 %class2 %class3
gmm1 1 -2.749137e+02 1 4 5.578275e+02 5.645830e+02 5.520659e+02 1.0000000 5.645830e+02 100.0
gmm2 2 -2.727644e+02 1 8 5.615287e+02 5.750398e+02 5.500057e+02 0.5230242 5.069998e+02 27.5 72.5
gmm3 3 -1.000000e+09 4 12 2.000000e+09 2.000000e+09 2.000000e+09 1.0000000 2.000000e+09 0.0 0.0 0
  G loglik conv npm AIC BIC SABIC entropy ICL %class1 %class2 %class3
gmm1_2 1 -273.3656 1 6 558.7312 568.8645 550.0889 1.0000000 568.8645 100.0
gmm2_2 2 -272.4872 2 10 564.9743 581.8631 550.5705 0.5851072 512.1929 15.0 85
gmm3_2 3 -271.4678 1 14 570.9356 594.5799 550.7702 0.6279997 528.4358 67.5 25 7.5
  G loglik conv npm AIC BIC SABIC entropy ICL %class1 %class2 %class3
gmm1_3 1 -271.8886 1 5 553.7772 562.2216 546.5753 1.0000000 562.2216 100.0
gmm2_3 2 -269.9264 1 9 557.8529 573.0528 544.8894 0.5242896 504.5760 27.5 72.5
gmm3_3 3 -269.3171 1 13 564.6342 586.5896 545.9092 0.3540472 531.7093 35.0 27.5 37.5

```

### Game 4 (Ghost blitz)

```

  G loglik conv npm AIC BIC SABIC entropy ICL %class1 %class2 %class3
lcga1 1 -362.7068 1 3 731.4136 736.4802 727.0924 1.0000000 736.4802 100.0
lcga2 2 -314.7383 1 6 641.4767 651.6100 632.8344 0.8587699 574.7613 70.0 30.0
lcga3 3 -312.5855 1 9 643.1709 658.3708 630.2075 0.6785763 590.6440 37.5 32.5 30
  G loglik conv npm AIC BIC SABIC entropy ICL %class1 %class2 %class3

```

|          |   |               |             |            |            |            |              |                |            |                |                |                |
|----------|---|---------------|-------------|------------|------------|------------|--------------|----------------|------------|----------------|----------------|----------------|
| gmm1     | 1 | -327.9895     | 1           | 4          | 663.9790   | 670.7345   | 658.2175     | 1.0000000      | 670.7345   | 100            |                |                |
| gmm2     | 2 | -312.7028     | 1           | 8          | 641.4055   | 654.9166   | 629.8825     | 0.8109574      | 578.7420   | 30             | 70.0           |                |
| gmm3     | 3 | -311.2305     | 1           | 12         | 646.4610   | 666.7276   | 629.1764     | 0.6527467      | 599.5928   | 35             | 32.5           | 32.5           |
| <b>G</b> |   | <b>loglik</b> | <b>conv</b> | <b>npm</b> | <b>AIC</b> | <b>BIC</b> | <b>SABIC</b> | <b>entropy</b> | <b>ICL</b> | <b>%class1</b> | <b>%class2</b> | <b>%class3</b> |
| gmm1_2   | 1 | -320.1054     | 1           | 6          | 652.2108   | 662.3441   | 643.5685     | 1.0000000      | 662.3441   | 100            |                |                |
| gmm2_2   | 2 | -310.9156     | 1           | 10         | 641.8312   | 658.7200   | 627.4274     | 0.8259024      | 582.5818   | 70             | 30             |                |
| gmm3_2   | 3 | -310.4083     | 1           | 14         | 648.8166   | 672.4609   | 628.6512     | 0.7892330      | 600.0956   | 20             | 70             | 10             |
| <b>G</b> |   | <b>loglik</b> | <b>conv</b> | <b>npm</b> | <b>AIC</b> | <b>BIC</b> | <b>SABIC</b> | <b>entropy</b> | <b>ICL</b> | <b>%class1</b> | <b>%class2</b> | <b>%class3</b> |
| gmm1_3   | 1 | -327.4906     | 1           | 5          | 664.9813   | 673.4257   | 657.7793     | 1.0000000      | 673.4257   | 100.0          |                |                |
| gmm2_3   | 2 | -310.0091     | 1           | 9          | 638.0182   | 653.2182   | 625.0548     | 0.8792127      | 575.6940   | 67.5           | 32.5           |                |
| gmm3_3   | 3 | -307.4605     | 1           | 13         | 640.9211   | 662.8765   | 622.1961     | 0.7300299      | 592.6022   | 22.5           | 45.0           | 32.5           |

#### GAMES IN THE CONTROL GROUP

##### Game 1 (Dixit)

|          |   |               |             |            |            |            |              |                |            |                |                |                |
|----------|---|---------------|-------------|------------|------------|------------|--------------|----------------|------------|----------------|----------------|----------------|
| <b>G</b> |   | <b>loglik</b> | <b>conv</b> | <b>npm</b> | <b>AIC</b> | <b>BIC</b> | <b>SABIC</b> | <b>entropy</b> | <b>ICL</b> | <b>%class1</b> | <b>%class2</b> | <b>%class3</b> |
| lcga1    | 1 | -394.4369     | 1           | 3          | 794.8738   | 800.2938   | 790.8901     | 1.0000000      | 800.2938   | 100.00000      |                |                |
| lcga2    | 2 | -375.1004     | 1           | 6          | 762.2007   | 773.0407   | 754.2333     | 0.7523395      | 689.4281   | 26.66667       | 73.33333       |                |
| lcga3    | 3 | -372.2895     | 1           | 9          | 762.5790   | 778.8390   | 750.6279     | 0.6530218      | 702.3439   | 20.00000       | 24.44444       | 55.55556       |
| <b>G</b> |   | <b>loglik</b> | <b>conv</b> | <b>npm</b> | <b>AIC</b> | <b>BIC</b> | <b>SABIC</b> | <b>entropy</b> | <b>ICL</b> | <b>%class1</b> | <b>%class2</b> | <b>%class3</b> |
| gmm1     | 1 | -378.7174     | 1           | 4          | 765.4348   | 772.6614   | 760.1231     | 1.0000000      | 772.6614   | 100.00000      |                |                |
| gmm2     | 2 | -374.1835     | 1           | 8          | 764.3669   | 778.8202   | 753.7437     | 0.5812068      | 698.7418   | 73.33333       | 26.66667       |                |
| gmm3     | 3 | -371.0778     | 1           | 12         | 766.1556   | 787.8356   | 750.2208     | 0.6106486      | 711.9140   | 20.00000       | 55.55556       | 24.44444       |
| <b>G</b> |   | <b>loglik</b> | <b>conv</b> | <b>npm</b> | <b>AIC</b> | <b>BIC</b> | <b>SABIC</b> | <b>entropy</b> | <b>ICL</b> | <b>%class1</b> | <b>%class2</b> | <b>%class3</b> |
| gmm1_2   | 1 | -377.7336     | 1           | 6          | 767.4672   | 778.3071   | 759.4997     | 1.0000000      | 778.3071   | 100.00000      |                |                |
| gmm2_2   | 2 | -373.2967     | 1           | 10         | 766.5933   | 784.6600   | 753.3143     | 0.8131777      | 699.4968   | 13.33333       | 86.66667       |                |
| gmm3_2   | 3 | -370.9350     | 1           | 14         | 769.8699   | 795.1632   | 751.2792     | 0.6133375      | 719.1685   | 20.00000       | 55.55556       | 24.44444       |
| <b>G</b> |   | <b>loglik</b> | <b>conv</b> | <b>npm</b> | <b>AIC</b> | <b>BIC</b> | <b>SABIC</b> | <b>entropy</b> | <b>ICL</b> | <b>%class1</b> | <b>%class2</b> | <b>%class3</b> |
| gmm1_3   | 1 | -376.6591     | 1           | 5          | 763.3183   | 772.3516   | 756.6788     | 1.0000000      | 772.3516   | 100.00000      |                |                |
| gmm2_3   | 2 | -372.2798     | 1           | 9          | 762.5596   | 778.8195   | 750.6084     | 0.6929753      | 697.2812   | 28.88889       | 71.11111       |                |
| gmm3_3   | 3 | -367.4487     | 1           | 13         | 760.8975   | 784.3841   | 743.6347     | 0.7572255      | 704.1616   | 8.88889        | 40.00000       | 51.11111       |

## Game 2 (Mmm!)

|             | G        | loglik           | conv     | npm      | AIC             | BIC             | SABIC           | entropy          | ICL             | %class1         | %class2          | %class3  |
|-------------|----------|------------------|----------|----------|-----------------|-----------------|-----------------|------------------|-----------------|-----------------|------------------|----------|
| lcga1       | 1        | -485.2884        | 1        | 3        | 976.5767        | 981.8603        | 972.4625        | 1.0000000        | 981.8603        | 100.00000       |                  |          |
| lcga2       | 2        | -408.4995        | 1        | 6        | 828.9990        | 839.5662        | 820.7707        | 0.9687003        | 754.2294        | 69.76744        | 30.23256         |          |
| lcga3       | 3        | -398.8696        | 1        | 9        | 815.7393        | 831.5901        | 803.3968        | 0.9351875        | 748.4206        | 13.95349        | 69.76744         | 16.27907 |
|             | G        | loglik           | conv     | npm      | AIC             | BIC             | SABIC           | entropy          | ICL             | %class1         | %class2          | %class3  |
| gmm1        | 1        | -419.3984        | 1        | 4        | 846.7967        | 853.8415        | 841.3111        | 1.0000000        | 853.8415        | 100.00000       |                  |          |
| <b>gmm2</b> | <b>2</b> | <b>-399.5052</b> | <b>1</b> | <b>8</b> | <b>815.0103</b> | <b>829.0999</b> | <b>804.0392</b> | <b>0.9337421</b> | <b>744.6925</b> | <b>69.76744</b> | <b>30.232558</b> |          |
| gmm3        | 3        | -394.6102        | 1        | 12       | 813.2205        | 834.3549        | 796.7638        | 0.9391178        | 750.5145        | 62.79070        | 2.325581         | 34.88372 |
|             | G        | loglik           | conv     | npm      | AIC             | BIC             | SABIC           | entropy          | ICL             | %class1         | %class2          | %class3  |
| gmm1_2      | 1        | -412.1845        | 1        | 6        | 836.3689        | 846.9361        | 828.1406        | 1.0000000        | 846.9361        | 100.0000        |                  |          |
| gmm2_2      | 2        | -397.5927        | 1        | 10       | 815.1855        | 832.7975        | 801.4716        | 0.9116509        | 748.6559        | 62.7907         | 37.209302        |          |
| gmm3_2      | 3        | -394.3040        | 1        | 14       | 816.6079        | 841.2647        | 797.4084        | 0.9395800        | 757.3940        | 62.7907         | 2.325581         | 34.88372 |
|             | G        | loglik           | conv     | npm      | AIC             | BIC             | SABIC           | entropy          | ICL             | %class1         | %class2          | %class3  |
| gmm1_3      | 1        | -418.7350        | 1        | 5        | 847.4701        | 856.2761        | 840.6131        | 1.0000000        | 856.2761        | 100.000000      |                  |          |
| gmm2_3      | 2        | -400.5383        | 1        | 9        | 819.0766        | 834.9274        | 806.7341        | 0.9422624        | 750.1420        | 30.232558       | 69.76744         |          |
| gmm3_3      | 3        | -396.6852        | 1        | 13       | 819.3703        | 842.2659        | 801.5422        | 0.9448621        | 757.9302        | 4.651163        | 67.44186         | 27.90698 |

## Game 3 (Story cubes)

|              | G        | loglik          | conv     | npm      | AIC              | BIC            | SABIC             | entropy          | ICL              | %class1         | %class2         | %class3         |
|--------------|----------|-----------------|----------|----------|------------------|----------------|-------------------|------------------|------------------|-----------------|-----------------|-----------------|
| lcga1        | 1        | -20.60549       | 1        | 3        | 47.210997        | 52.56356       | 43.162760         | 1.0000000        | 52.56357         | 100.00000       |                 |                 |
| lcga2        | 2        | 0.88635         | 1        | 6        | 10.227289        | 20.93242       | 2.130814          | 0.8600284        | -64.00215        | 22.72727        | 77.27273        |                 |
| <b>lcga3</b> | <b>3</b> | <b>13.52423</b> | <b>1</b> | <b>9</b> | <b>-9.048474</b> | <b>7.00923</b> | <b>-21.193186</b> | <b>0.8033956</b> | <b>-74.07344</b> | <b>50.00000</b> | <b>27.27273</b> | <b>22.72727</b> |
|              | G        | loglik          | conv     | npm      | AIC              | BIC            | SABIC             | entropy          | ICL              | %class1         | %class2         | %class3         |
| gmm1         | 1        | -5.347778       | 1        | 4        | 18.695556        | 25.83231       | 13.297906         | 1.0000000        | 25.83231         | 100.00000       |                 |                 |
| gmm2         | 2        | 1.477188        | 1        | 8        | 13.045624        | 27.31914       | 2.250324          | 0.6329425        | -50.31119        | 22.72727        | 77.27273        |                 |
| gmm3         | 3        | 13.524237       | 1        | 12       | -3.048474        | 18.36180       | -19.241423        | 0.8033964        | -62.72090        | 22.72727        | 50.00000        | 27.27273        |
|              | G        | loglik          | conv     | npm      | AIC              | BIC            | SABIC             | entropy          | ICL              | %class1         | %class2         | %class3         |
| gmm1_2       | 1        | -3.067831       | 1        | 6        | 18.135661        | 28.84080       | 10.03919          | 1.0000000        | 28.84080         | 100.00000       |                 |                 |
| gmm2_2       | 2        | 11.044135       | 2        | 10       | -2.088270        | 15.75363       | -15.58239         | 0.9245108        | -70.98336        | 77.27273        | 22.72727        |                 |
| gmm3_2       | 3        | 13.524237       | 1        | 14       | 0.951525         | 25.93018       | -17.94025         | 0.8033962        | -55.15251        | 50.00000        | 22.72727        | 27.27273        |
|              | G        | loglik          | conv     | npm      | AIC              | BIC            | SABIC             | entropy          | ICL              | %class1         | %class2         | %class3         |

```

gmm1_3 1 -1.636040    1   5 13.272080 22.19303   6.525018 1.0000000 22.19303 100.00000
gmm2_3 2  5.917644    1   9  6.164711 22.22242  -5.980000 0.8714145 -63.00365 77.27273 22.72727
gmm3_3 3 14.073291    1  13 -2.146583 21.04788 -19.688945 0.7789466 -58.74891 27.27273 22.72727      50

```

#### Game 4 (Mixmo)

```

      G  loglik conv npm      AIC      BIC      SABIC  entropy      ICL  %class1 %class2 %class3
lcga1 1 -327.3445    1   3 660.6890 666.1090 656.7052 1.0000000 666.1090 100.00000
lcga2 2 -308.9178    1   6 629.8357 640.6757 621.8683 0.9734609 551.0493 91.11111 8.888889
lcga3 3 -303.2983    1   9 624.5966 640.8565 612.6454 0.8544106 555.7768 11.11111 8.888889      80
      G  loglik conv npm      AIC      BIC      SABIC  entropy      ICL  %class1 %class2 %class3
gmm1  1 -315.0450    1   4 638.0900 645.3166 632.7783 1.0000000 645.3166 100.00000
gmm2  2 -305.5450    1   8 627.0900 641.5433 616.4668 0.9699371 552.3662  8.888889 91.11111
gmm3  3 -303.2983    2  12 630.5966 652.2765 614.6617 0.8544099 567.1969  8.888889 80.00000 11.11111
      G  loglik conv npm      AIC      BIC      SABIC  entropy      ICL  %class1 %class2 %class3
gmm1_2 1 -312.3766    1   6 636.7532 647.5932 628.7858 1.0000000 647.5932 100.00000
gmm2_2 2 -306.5310    1  10 633.0619 651.1285 619.7828 0.4284326 576.6864 75.55556 24.444444
gmm3_2 3 -303.2983    1  14 634.5966 659.8898 616.0059 0.8544101 574.8102 80.00000 8.888889 11.11111
      G  loglik conv npm      AIC      BIC      SABIC  entropy      ICL  %class1 %class2 %class3
gmm1_3 1 -312.8637    1   5 635.7273 644.7606 629.0878 1.0000000 644.7606 100.00000
gmm2_3 2 -303.2856    1   9 624.5713 640.8312 612.6201 0.9532432 551.7100 91.11111 8.888889
gmm3_3 3 -301.0909    1  13 628.1817 651.6683 610.9190 0.8570276 566.6134 77.77778 13.333333 8.888889

```

Note. Selected models are marked in red.



Table S4. Modulation of the evolution through games in the effects of the cognitive intervention.

| Game        | Cognitive process                 | F            | p           |
|-------------|-----------------------------------|--------------|-------------|
| Deja-vu     | KTT - Linguistic Working Memory   | .8934        | .348        |
|             | KTT - Visuospatial Working Memory | .017         | .898        |
|             | 5D – Inhibition                   | 2.616        | .115        |
|             | 5D – Flexibility                  | .4275        | .518        |
| Ghost blitz | KTT - Linguistic Working Memory   | .799         | .374        |
|             | KTT - Visuospatial Working Memory | .262         | .613        |
|             | 5D – Inhibition                   | .408         | .527        |
|             | 5D – Flexibility                  | <b>4.721</b> | <b>.036</b> |
| Mmm!        | KTT - Linguistic Working Memory   | .951         | .338        |
|             | KTT - Visuospatial Working Memory | .988         | .332        |
|             | 5D – Inhibition                   | .127         | .724        |
|             | 5D – Flexibility                  | .739         | .397        |
| Story cubes | KTT - Linguistic Working Memory   | 1.435        | .255        |
|             | KTT - Visuospatial Working Memory | .371         | .695        |
|             | 5D – Inhibition                   | .982         | .386        |
|             | 5D – Flexibility                  | .188         | .829        |
| Mixmo       | KTT - Linguistic Working Memory   | .208         | .650        |
|             | KTT - Visuospatial Working Memory | <b>5.788</b> | <b>.025</b> |
|             | 5D – Inhibition                   | .294         | .592        |
|             | 5D – Flexibility                  | .013         | .912        |

Note. The table only depicts the specific results of the interaction between the intraindividual factor (pre-post) and the group of the game.
